1 **The majority of the matrix protein TapA is dispensable for biofilm formation by *Bacillus subtilis***

2

3 Chris Earl<sup>1</sup>, Sofia Arnaouteli<sup>1</sup>, Tetyana Sukhodub<sup>1</sup>, Cait E. MacPhee<sup>2</sup>, Nicola R. Stanley-Wall<sup>1</sup>

4

5 <sup>1</sup> Division of Molecular Microbiology, School of Life Sciences, University of Dundee, Dundee, UK DD1 5EH

6 <sup>2</sup> James Clerk Maxwell Building, School of Physics, University of Edinburgh, The Kings Buildings, Mayfield  
7 Road, Edinburgh EH9 3JZ

8

9 **To whom correspondence should be addressed:**

10 Prof. Nicola R. Stanley-Wall

11 Division of Molecular Microbiology, School of Life Sciences, University of Dundee, Dundee DD1 5EH.

12 Email: [n.r.stanleywall@dundee.ac.uk](mailto:n.r.stanleywall@dundee.ac.uk)

13 OR

14 Prof. Cait MacPhee

15 James Clerk Maxwell Building, School of Physics and Astronomy, University of Edinburgh, Edinburgh EH9

16 3JZ, United Kingdom

17 Email: [cait.macphee@ed.ac.uk](mailto:cait.macphee@ed.ac.uk)

18

19 **Keywords: *Bacillus subtilis*, biofilm matrix, TapA, TasA, extracellular proteases**

20

21

## 22 **Summary**

23 Biofilm formation is a co-operative behaviour where microbial cells become embedded in an extracellular  
24 matrix. This biomolecular matrix plays a key role in the manifestation of the beneficial or detrimental  
25 outcome mediated by the collective of cells. *Bacillus subtilis* is an important bacterium for understanding  
26 the general principles of biofilm formation and is a plant growth-promoting organism. The protein  
27 components of the *B. subtilis* matrix include the secreted proteins BslA, which forms a hydrophobic coat  
28 over the biofilm, and TasA, which forms protease-resistant fibres needed for structuring. A third protein  
29 TapA (for TasA anchoring and assembly protein) is needed for biofilm formation and helps TasA fibre  
30 formation *in vivo* but is dispensable for TasA-fibre assembly *in vitro*. Here we show that TapA is subjected  
31 to proteolytic cleavage in the biofilm and that only the first 57 amino acids of the 253-amino acid protein  
32 are required for biofilm architecture. However, through the construction of a strain which lacks all eight  
33 extracellular proteases, we show that proteolytic cleavage by these enzymes is not a prerequisite for TapA  
34 function. It remains unknown why TapA is synthesized at a full length of 253 amino acids when the first  
35 57 are sufficient for biofilm structuring, but the findings do not exclude the core conserved region of TapA  
36 having a second role beyond that of structuring the *B. subtilis* biofilm.

37

## 38 Introduction

39 The predominant state in which bacteria and archaea live on Earth is in the form of biofilms  
40 (Flemming *et al.*, 2016): aggregates of microorganisms embedded in a self-made extracellular matrix.  
41 Molecules that can be found in the biofilm matrix include extracellular DNA, exopolysaccharides, lipids  
42 and proteins, the latter of which can self-assemble into a variety of functional forms including filaments,  
43 films, or fibres (Erskine *et al.*, 2018a). The biofilm matrix conveys ‘emergent properties’ to the cells in the  
44 biofilm (Dragos & Kovacs, 2017) including, but not limited to, providing structure and stability to the  
45 community (Hobley *et al.*, 2015), aiding the sequestration of nutrients and retaining extracellular enzymes  
46 which facilitates further processing of the biofilm matrix (Flemming *et al.*, 2016).

47 Biofilm formation by the Gram-positive bacterium *Bacillus subtilis* has been intensively studied  
48 and the production of the molecules in the matrix is known to be highly controlled by a suite of  
49 transcription regulators (Cairns *et al.*, 2014). The exopolymeric matrix of the *B. subtilis* biofilm is comprised  
50 of polymers that include an exopolysaccharide (EPS) and an amphiphilic protein BslA which assembles to  
51 form a hydrophobic film on the biofilm surface (Kobayashi & Iwano, 2012, Hobley *et al.*, 2013). The major  
52 protein component of the *Bacillus subtilis* matrix is protease-resistant fibres formed by the secreted  
53 protein TasA (Erskine *et al.*, 2018b, Romero *et al.*, 2010). These fibres provide structural integrity to the  
54 biofilm and are necessary for the characteristic wrinkled phenotype of biofilms and pellicles (Branda *et*  
55 *al.*, 2006).

56 The *tasA* coding region is located within an operon alongside two other genes: namely *sipW*  
57 and *tapA* (formerly *yqxM*) (Zhu & Stulke, 2018). SipW is a specialised signal peptidase that is linked with  
58 removal of the signal peptide from both TasA (Stover & Driks, 1999b) and TapA (Stover & Driks, 1999a)  
59 during the secretion process. SipW also has links with the control of expression of the *epsA-O* operon  
60 which encodes the proteins needed for the biofilm exopolysaccharide (Terra *et al.*, 2012). Thus, *sipW* is  
61 essential for biofilm formation. TapA is described as an accessory protein that is needed for the formation

62 of TasA fibres (Romero *et al.*, 2011, Romero *et al.*, 2010), and more specifically, for the attachment of the  
63 TasA fibres to the cell surface. Secondary structure analysis revealed TapA to be a two-domain protein  
64 with significant regions of disorder (Abbasi *et al.*, 2019). Additionally TapA has recently been shown to  
65 form fibres (El Mammeri *et al.*, 2019). The absence of TapA is correlated with a reduction in the level of  
66 TasA in the biofilm matrix (Romero *et al.*, 2014). Evidence indicates however that, in the absence of TapA,  
67 recombinant TasA self-assembles into protease-resistant fibres that are structurally and functionally  
68 comparable to native fibres extracted from *B. subtilis* (El Mammeri *et al.*, 2019, Erskine *et al.*, 2018b).  
69 Moreover, when provided exogenously these self-assembled recombinant TasA fibres are also biologically  
70 active *in vivo* in the absence of TapA (Erskine *et al.*, 2018b). Thus, further evaluation of the function and  
71 activity of TapA is warranted.

72           Here we identify that amino acids 1-57 (inclusive) of TapA form a minimal functional unit of the  
73 protein that is required to give rise to the complex architecture of the *B. subtilis* biofilm. Ectopic  
74 provision of the DNA encoding this truncated form of TapA is sufficient to restore rugose biofilm  
75 formation to the *tapA* deletion strain (the full length protein is 253 amino acids in length). We identify,  
76 through site directed mutagenesis, key amino acids in the minimal, functional TapA form that are  
77 required for bioactivity and, in doing so, uncover essential hydrophobic amino acids. We show that *in*  
78 *vivo* TapA is proteolytically cleaved to lower molecular weight forms by the native extracellular  
79 proteases secreted into the external environment. Finally we establish that proteolysis of TapA by the  
80 extracellular proteases is not a prerequisite to activity, suggesting that TapA is degraded after it has  
81 fulfilled its function *in vivo*.

## 82 Results

### 83 Construction and complementation of a *B. subtilis tapA* mutant

84 To investigate the functional regions of *tapA*, an in-frame *tapA* deletion strain was constructed  
85 and the deleterious impact on biofilm formation confirmed (Romero et al., 2011) (Fig. 1A). As expected,  
86 the rugosity exhibited by the biofilm formed by the parental NCIB3610 isolate was absent when *tapA*  
87 was deleted, and was fully reinstated when the *tapA* coding region was expressed from the ecotopic  
88 *amyE* locus under the control of the IPTG inducible promoter, Pspank (Fig. 1A). For comparison  
89 purposes, a *tasA* deletion strain was examined. This strain also formed flat biofilms that lacked the  
90 corrugations and ridges displayed by the wild type strain (Fig. 1A). However, subtle, but consistent  
91 differences between the morphology of the *tapA* and *tasA* deletion strains were apparent, with the *tapA*  
92 deletion strain occupying a larger footprint than the *tasA* deletion strain (Fig. 1A).

93 The *tapA* gene is present in a range of *Bacillus* species and analysis of the protein sequences of  
94 TapA from *B. subtilis*, *B. amyloliquefaciens*, *B. paralicheniformis* and *B. pumilus* reveals domains with a  
95 high degree of conservation and other regions of variability. There are also marked differences in the  
96 length of the *tapA* coding region between the different species (Fig. 1B) (Romero et al., 2014). We tested  
97 whether these variations in gene length impacted the ability of the orthologous coding regions to  
98 genetically substitute for the *B. subtilis tapA* coding region. Heterologous expression of the *tapA* coding  
99 region from *B. amyliquofacienes*, *B. paralicheniformis* and *B. pumilus* in the *B. subtilis tapA* deletion  
100 strain resulted in IPTG-dependent recovery of biofilm architecture, such that the resulting biofilms were  
101 indistinguishable from those formed by the wild type NCIB3610 *B. subtilis* strain (Fig. 1C). These findings  
102 are consistent with, and extend, those previously published that revealed *tapA* from *B. amyliquofacienes*  
103 was able to functionally replace TapA of *B. subtilis* (Romero et al., 2014), indicating the presence of  
104 conserved amino acids necessary for TapA function .

## 105 Identification of a TapA minimal functional unit

106 Previous work has preliminarily explored if TapA has a functional unit that is shorter than the full  
107 length coding region: the coding region for amino acids 194-230 of TapA could be deleted and the  
108 resulting truncated protein retained activity (Romero et al., 2014). Therefore, to determine the length of  
109 the *tapA* minimal functional coding region, we systematically constructed truncations of the *tapA* coding  
110 region, deleting the *tapA* coding region sequentially from the 3' end. The ability of the variant-length  
111 *tapA* constructs to genetically complement the *tapA* deletion strain was tested after integration to the  
112 chromosome at the *amyE* locus. Expression of the coding region was placed under the control of the  
113 IPTG inducible promoter. In total 22 variants of the *tapA* coding region were assessed (Fig. 2A, S1A). We  
114 noted that the TapA<sub>1-60</sub> variant was fully functional while the TapA<sub>1-50</sub> form lacked activity and could not  
115 restore biofilm architecture to the *tapA* mutant (Fig 2B). Therefore we made additional constructs with  
116 finer scale changes in the region coding amino acids 60 and 50 of TapA (Fig 2C). Through this analysis it  
117 was established that amino acids 1-57, inclusive, represent the minimal form of TapA that is capable of  
118 reinstating complex biofilm formation to the *tapA* deletion strain. This conclusion was reached primarily  
119 through a visual analysis of biofilm rugosity (Fig. 2B and 2C, S1A). Additionally, as the level of TasA (25.7  
120 kDa) in the biofilm is substantially reduced in the absence of functional TapA (Romero et al., 2014) (Fig.  
121 S1B), the bioactivity of the truncations were also supported by immunoblot analysis which showed a  
122 recovery of TasA levels (Fig. S1B). The identification of this region of *tapA* as sufficient for TapA activity is  
123 consistent with the previous identification of amino acids 50-57 as being needed for TapA function in  
124 the full length protein (Romero et al., 2014).

## 125 Amino acids critical for function in the minimal functional region of TapA

126 We were interested in the features of the TapA minimal form that conferred activity. The  
127 predicted TapA signal sequence likely comprises 43 amino acids (Petersen *et al.*, 2011) (not 33 amino

128 acids as previously stated (Romero et al., 2014)) and the signal sequence is purported to be cleaved by a  
129 specialised signal peptidase, SipW (Stover & Driks, 1999a). Here we demonstrate that the first 43 amino  
130 acids are not needed for activity, as the TapA signal sequence can be replaced with the 28 amino acid  
131 TasA signal sequence, which is cleaved by SipW (Stover & Driks, 1999a, Stover & Driks, 1999b). When  
132 the chimeric construct, P<sub>IPTG</sub>-*tasAss-tapA*<sub>44-253</sub>, was expressed in the *tapA* deletion strain biofilm  
133 formation was fully reinstated (Fig. 3A). Therefore, the influence of amino acids 1-43 of TapA on protein  
134 function were excluded from further analysis.

135           Next, site-directed mutagenesis was used to generate a series of constructs containing  
136 systematic substitutions in the *tapA*<sub>44-57</sub> coding region in the context of the minimal TapA<sub>1-57</sub> construct  
137 (Fig. 3B). The variant constructs were introduced into the *tapA* deletion strain and the ability of the  
138 variant TapA forms to restore biofilm formation assessed (Fig. 3C-3R). We first tested if the properties of  
139 the amino acid in position 57 were critical for activity. This was important to determine, as provision of  
140 the *tapA* coding region for amino acids 1-56 was unable to support biofilm recovery (Fig. 2C), whereas  
141 that encoding TapA<sub>1-57</sub> was biologically active (Fig. 2C and 3C). A variant of TapA<sub>1-57</sub>, where threonine 57  
142 was replaced with alanine, had biological activity and therefore indicated that the chemical properties of  
143 amino acid 57 was less important than its presence (Fig. 3D). Therefore we concluded that the length of  
144 the TapA<sub>1-57</sub> variant form is likely to be the important feature driving activity of TapA<sub>1-57</sub>.

145           We established that glutamine could substitute for alanine at amino acid position 56 (Fig. 3E). In  
146 contrast, replacement of leucine 55 with alanine generated a variant that was unable to support biofilm  
147 recovery in the *tapA* deletion strain (Fig. 3F). The importance of the hydrophobic nature of leucine 55  
148 was supported as substitution with isoleucine, an amino acid with similar properties, was able to  
149 maintain the biological activity of TapA<sub>1-57</sub> (Fig. 3G), while replacement with lysine, which mimics the size  
150 and shape of the leucine side chain but not the hydrophobicity, was not (Fig. 3H). We went on to show  
151 that the side chain of serine 54 was not essential for activity as TapA<sub>1-57</sub> S54A fulfilled a role that was

152 indistinguishable from the construct encoding TapA<sub>1-57</sub> (Fig. 3I). Moving one amino acid along to valine  
153 53, while both TapA<sub>1-57</sub> V53A and TapA<sub>1-57</sub>V53K were unable to support formation of a rugose biofilm  
154 (Fig. 3J and 3L), the hydrophobicity of the side chain was essential with TapA<sub>1-57</sub> V53I showing biological  
155 activity (Fig. 3K).

156         The replacement of aspartic acid at position 52 with either alanine (Fig. 3M) or asparagine (Fig.  
157 3N) conferred (partial) structuring to the biofilm. In contrast TapA<sub>1-57</sub> D52L had limited activity which  
158 demonstrates that replacement of an acidic amino acid with a large hydrophobic amino acid at position  
159 52 is detrimental to TapA activity (Fig 3O). At position 51 changing phenylalanine to alanine resulted in  
160 biofilms with partial structure, indicating that TapA<sub>1-57</sub> F51A has limited function (Fig 3P). Finally two  
161 further features of the amino acid sequence stood out: 1) a conserved aspartic acid at position 47; and  
162 2) an invariant phenylalanine at position 45. Constructs that resulted in individual substitution of these  
163 amino acids to alanine were generated. TapA<sub>1-57</sub> D47A revealed only a partial ability to recover biofilm  
164 morphology (Fig. 3Q), while TapA<sub>1-57</sub> F45A exerted no biological activity (Fig. 3L). In summary through  
165 this analysis we have identified amino acids F45, D52, V53 and L55 to be important for TapA function.  
166 These data underscore the importance of this stretch of amino acids to TapA function, however further  
167 analysis will be required to elucidate the role they play in facilitating TapA activity.

#### 168 **TapA is detected *in vivo* at a low molecular mass**

169         As the truncated variant of TapA covering amino acids 1-57 (inclusive) is sufficient for bioactivity,  
170 we wondered if TapA was processed to a smaller form *in vivo* and, if so, whether processing was a  
171 prerequisite for TapA function. To probe the molecular weight of TapA in the biofilm we first generated  
172 a custom TapA antibody using recombinant *B. subtilis* TapA<sub>34-253</sub> as the antigen: a region that covers the  
173 mature secreted TapA protein. When the ability of the new antibody to bind to recombinant TapA<sub>44-253</sub>  
174 protein was tested, a single band was detected at ~30 kDa (Fig. 4A), the apparent molecular mass where



175 recombinant TapA<sub>44-253</sub> is observed by SDS-PAGE. In contrast, immunoblot analysis of proteins extracted  
176 from the wild-type NCIB3610 sample revealed multiple distinct bands with apparent molecular masses  
177 of approximately 30 kDa, 18 kDa, and 16 kDa using  $\alpha$ TapA antibodies. These bands were absent from  
178 the protein sample derived from the *tapA* mutant (Fig. 4B). The immunoreactive bands returned in an  
179 IPTG-dependent manner when proteins from the *tapA* complementation strain were analysed by  
180 immunoblot (Fig. 4B), indicating that they are dependent on TapA.

181         Given the unexpected banding pattern observed using the proteins extracted from the wild type  
182 biofilm, further confirmation of the specificity of the  $\alpha$ TapA antibody towards TapA was warranted.  
183 Considering the functional connections between TapA, TasA and SipW, proteins extracted from *tasA* and  
184 *sipW* deletion strains were examined by immunoblot using the  $\alpha$ TapA antibody (Fig. 4C). For the *tasA*  
185 sample, a different banding profile to that of the wild-type was uncovered, with two of the three bands  
186 detected in the wild-type sample being absent. The third band, with an apparent molecular mass of 16  
187 kDa, was still visible (Fig. 4C). The protein sample extracted from the *sipW* mutant displayed the lower  
188 18 kDa and 16 kDa bands, however, as with the *tasA* sample, the 30 kDa band was again absent (Fig. 4C).

189         We also examined the protein samples using a TasA specific antibody (Erskine et al., 2018b) (Fig.  
190 4D). We detected a dominant band at ~30 kDa for the wild-type strain, that was absent in the *tasA*  
191 sample and greatly reduced in the *tapA* and *sipW* strains (Fig. 4D). The reduction in the level of TasA is  
192 consistent with TapA and SipW influencing the amount of stable, secreted TasA (Romero et al., 2011).  
193 These findings also raised the possibility that the 30 kDa band detected using the  $\alpha$ TapA antibody is  
194 actually TasA, not TapA: TasA is a dominant biofilm matrix protein that can be detected after coomassie  
195 staining of proteins analysed by SDS-PAGE (Erskine et al., 2018b, Branda et al., 2006). Consistent with  
196 the upper 30 kDa band being TasA, when proteins were extracted from a rugose biofilm where the  
197 truncated form of TapA (TapA<sub>1-60</sub>), which is capable of recovering biofilm formation, was expressed, the

198  $\alpha$ TapA antibodies detected only the ~30 kDa band (Fig. 4E). We therefore conclude that the 16 kDa and  
199 18 kDa bands are specific to TapA and the bands at 30 kDa and 18 kDa are proteins that are detected by  
200 the  $\alpha$ TapA antibody when both TapA and TasA are present. The 30kDa band is likely to be TasA and the  
201 16 kDa and 18 kDa bands processed forms of TapA. Overall the banding profile supports the conclusion  
202 that processing of TapA to smaller molecular weight forms occurs *in vivo*.

203 We next determined if low molecular mass TapA bands were detected in protein samples  
204 extracted from biofilms formed by other *B. subtilis* isolates. To do this we grew biofilms of *B. subtilis*  
205 isolates RO-FF-1, ATCC 9799 and B-14393T, alongside NCIB3610. After 48 hours incubation each of the  
206 isolates had formed a rugose biofilm (Fig. 4F). The mature biofilms were used to extract proteins  
207 corresponding to the total biofilm content and immunoblot analysis, using the  $\alpha$ TapA antibody, clearly  
208 revealed that the TapA banding pattern was replicated in each of the distinct isolates (Fig. 4G). The  
209 consistent detection of TapA at a low molecular mass indicates that *in vivo* TapA may be subjected to  
210 processing in a controlled manner.

### 211 **TapA is cleaved by extracellular proteases**

212 The detection of  $\alpha$ TapA immunoreactive bands at low molecular weight raised the hypothesis  
213 that after secretion TapA is proteolytically cleaved in the extracellular environment, and that cleavage of  
214 TapA could release a functionally active form of the protein. *B. subtilis* encodes eight major secreted  
215 extracellular proteases that might fulfil this role named Bpr, Vpr, NprB, Mpr, Epr, AprE, NprE and WprA  
216 (Zhu & Stulke, 2018). To begin to explore this hypothesis, the susceptibility of recombinant TapA<sub>44-253</sub> to  
217 proteolytic cleavage was first tested by incubating recombinant TapA<sub>44-253</sub> with spent culture  
218 supernatant from strain NCIB3610, which contains the extracellular proteases secreted after growth to  
219 stationary phase. A control reaction for this experiment where the spent culture supernatant was heat  
220 treated for 10 min at 100°C to denature the native exoproteases was also implemented. 120  $\mu$ g of

221 recombinant TapA<sub>44-253</sub> was added to the culture supernatant and incubated for 8 hrs at 37°C. When the  
222 samples were analysed by SDS-PAGE the full length protein was no longer detectable when incubated  
223 with untreated culture supernatant, but the protein remained at full size when incubated with the heat  
224 treated culture supernatant (Fig. S2A). Taken together with data indicating that TapA is a secreted  
225 protein, these findings suggest that the extracellular proteases can degrade TapA *in vivo*.

## 226 **Proteolysis of TapA is not needed for biofilm formation**

227 To test the potential impact of blocking proteolytic cleavage of TapA on biofilm formation, and  
228 thereby establish if proteolysis of TapA was a requirement for activity, we constructed a strain that  
229 lacked seven of the secreted exoproteases (hereafter KO7: NRS6362) and another which lacked all eight  
230 secreted exoproteases (hereafter KO8: NRS5645). Neither of the strains generated showed any evidence  
231 of proteolytic activity when grown on LB agar supplemented with 1.5% (w/v) milk, similar to the *degU*  
232 deletion strain which was used as a negative control (Fig. S2B) (Msadek *et al.*, 1990).

233 We first tested the stability of recombinant TapA protein in spent culture supernatant isolated  
234 from the KO7 and KO8 strains. After incubation there was limited evidence of proteolysis of  
235 recombinant TapA<sub>44-253</sub> when incubated with KO7 supernatant and no observable degradation of TapA<sub>44-</sub>  
236 <sub>253</sub> when it was incubated with KO8 supernatant (Fig. S2A). Consistent with these findings, immunoblot  
237 analysis of proteins extracted after growth for 48 hours under biofilm formation conditions revealed  
238 that *in vivo* processing of TapA to the  $\alpha$ TapA specific 16 kDa form was impeded in both the KO7 and KO8  
239 strains. The 18 kDa and 30 kDa bands were still detected but additional bands of intermediate sizes were  
240 also apparent (Fig. 5A). We postulate that the additional bands in the KO7 and KO8 strains represent  
241 differentially cleaved TapA fragments.

242 Despite the *in vivo* block in TapA proteolysis, no obvious impact on the structure of the mature  
243 biofilm was detected for the KO7 strain (Fig. 5B). In contrast, the KO8 strain displayed a defect in biofilm

244 formation, lacking the robust structuring typical of the wild-type strain (Fig. 5B). The single *wprA*  
245 deletion strain, the last gene to be deleted in the KO8 strain, showed no alternation in biofilm formation  
246 (Fig. 2SD). Therefore the lack of wrinkles in the biofilm formed by the KO8 strain was not specific to the  
247 absence of WprA. The lack of rugosity is not likely to be a consequence of a generalised growth defect as  
248 both the wild type and KO8 strain had comparable growth rates and yields in MSgg under shaking  
249 culture conditions (Fig. S2C).

250 To determine if the reduction in rugosity displayed by the KO8 strain was due to a lack of TapA  
251 processing, we introduced the minimal functional unit coding region, TapA<sub>1-57</sub>, at the *amyE* location and  
252 assessed biofilm formation. We hypothesized that if processing of TapA was essential for function  
253 introduction of TapA<sub>1-57</sub> should reinstate biofilm architecture. In opposition to this hypothesis, it was  
254 found that production of TapA<sub>1-57</sub> was unable to re-instate rugosity of KO8 biofilms such that it looked  
255 like the wild-type strain (NRS6960) (Fig. S2E). Taken together with the immunoblot data demonstrating  
256 the same TapA banding pattern in the KO7 and KO8 strains, these findings indicate that proteolytic  
257 cleavage of TapA by extracellular proteases is not a prerequisite to generate a functionally active form of  
258 TapA.

### 259 **TapA is not a chaperone protecting TasA from exoprotease activity**

260 The exact role of TapA during biofilm formation is elusive having been linked with TasA stability  
261 (Romero et al., 2011), TasA-fibre formation and attachment (Romero et al., 2010, Romero et al., 2011)  
262 and forming fibres itself (El Mammeri et al., 2019). The construction of the exoprotease minus strain  
263 allowed us to test the possibility that it functions as a chaperone. The formation of exoprotease-resistant  
264 fibres by TasA is linked with TapA *in vivo*, with the levels of TasA being reduced in the *tapA* mutant strain  
265 (Fig 4D). Moreover, TasA is prone to degradation by the exoproteases, when it is not in fibre form (Fig.  
266 S3A and S3B) (Erskine et al., 2018b). Therefore one hypothesis is that TapA is a chaperone that shields

267 monomeric TasA from proteolytic degradation in the extracellular environment, thereby allowing TasA  
268 fibres to form. If correct, we predicted that TapA would not be needed for TasA fibre formation, and  
269 consequentially biofilm formation, in a strain lacking the extracellular proteases. Consistent with this  
270 hypothesis, recombinant TasA, that is restricted to a monomeric form by the addition of a single amino  
271 acid at the N-terminus (Erskine et al., 2018b), is only prone to degradation by the extracellular proteases  
272 found in the wild type culture supernatant. The recombinant protein is not degraded when incubated in  
273 culture supernatant isolated after growth of the exoprotease-free KO8 strain (Fig. S3A) (Erskine et al.,  
274 2018b). To determine if *tapA* would be needed for biofilm formation in the absence of extracellular  
275 proteases, we deleted *tapA* from the KO7 and KO8 strains and examined biofilm formation. The biofilms  
276 formed by strains KO7  $\Delta tapA$  (NRS6293) and KO8  $\Delta tapA$  (NRS5646) were examined and contrary to our  
277 hypothesis both the KO7  $\Delta tapA$  and KO8  $\Delta tapA$  formed biofilms with the flat, featureless appearance of  
278 the  $\Delta tapA$  strain (Fig 6A and 6B). In each case the biofilm defect was specific to the loss of *tapA* as biofilm  
279 formation was reinstated when the full length *tapA* coding region was expressed from the *amyE* location  
280 (Fig. 6A and 6B). Additionally we were able to demonstrate that TapA<sub>1-57</sub> was still functional in this system:  
281 we found that it could restore the colony morphology of KO8  $\Delta tapA$  biofilms (NRS6961) (Fig. S2F) to similar  
282 levels as displayed by the KO8 strain (NRS5645) (Fig. S2E). Together these data indicate that *tapA* does  
283 not become dispensable during biofilm formation in the absence of extracellular proteases and therefore  
284 is unlikely to serve as a chaperone to protect monomeric TasA from degradation during fibre formation.  
285

286 **Discussion:**

287 An extracellular matrix comprised of polymers is critical to structure sessile communities of  
288 bacterial cells called biofilms. Biofilm matrix production by *Bacillus subtilis* depends on the protein TapA,  
289 which has a role in promoting TasA stability and fibre formation *in vivo*. Here we show that orthologous  
290 *tapA* genes, originating from other *Bacillus* species, are functional in *B. subtilis* NCIB3610 strain. This is in  
291 agreement with previous work which found that *tapA* from *B. amyliquofacienes* can substitute for the *B.*  
292 *subtilis tapA* coding region (Romero et al., 2014). The *B. pumilis* TapA protein is 61 amino acids shorter at  
293 the C-terminus, compared with *B. subtilis* TapA, indicating that the extreme C-terminal amino acids are  
294 dispensable for rugose biofilm formation. Consistent with this, when a truncated form of the *B. subtilis*  
295 *tapA* open reading frame was used to encode a variant form of TapA that lacked the C-terminus it was  
296 functional. Further investigations presented here determined that the minimal functional unit of TapA  
297 consists of amino acids TapA<sub>1-57</sub>. This was unexpected as the region of TapA with the highest conservation  
298 amongst the orthologues (amino acids 58-253 inclusive) was not needed to restore rugose biofilms to the  
299 *tapA* deletion strain. We have also shown that the predicted TapA signal sequence, which consists of  
300 amino acids 1-43, can be replaced with the predicted TasA signal sequence. This therefore leaves a  
301 functional component of TapA of only 14 amino acids (amino acids 44-57 inclusive). We cannot, however,  
302 rule out the possibility that amino acids 58-253 of TapA serve a distinct function beyond rugose biofilm  
303 formation. Indeed, recent work has suggested that the C-terminus of TapA is a disordered protein while  
304 the N-terminus is a structured domain, with the 2 domains interacting with lipid vesicles in a cooperative  
305 manner (Abbasi et al., 2019).

306 Further to the discovery of the minimal functional form of TapA, we uncovered that TapA was processed  
307 *in vivo* to lower molecular weight forms in the biofilm. We also observed processed forms of TapA in the  
308  $\Delta sipW$  mutant which is suggestive of the conclusion SipW is not essential for TapA secretion. It could be  
309 that another signal peptidase(s) can substitute for the loss of *sipW* in terms of TapA secretion or that TapA

310 is retained associated with the cell membrane *via* its signal peptide when it is processed. The cleavage of  
311 TapA to lower molecular weight forms is conserved amongst other *B. subtilis* isolates and depends on  
312 extracellular proteases. We speculated that TapA processing might be needed to generate an active  
313 variant of TapA and tested the impact of deleting the genes encoding the extracellular proteases on  
314 biofilm formation. While we found that TapA processing to lower molecular weight forms was altered  
315 both in a strain lacking Bpr, Vpr, NprB, Mpr, Epr, AprE, and NprE (KO7) and a second where WprA was also  
316 deleted (KO8), in contradiction to our hypothesis, although there was a partial defect in biofilm formation  
317 exhibited by the KO8 strain, the biofilm formed by KO7 resembled wild-type morphology. As analysis of  
318 the TapA protein from these biofilms showed a similar banding pattern using immunoblot in both the KO8  
319 and KO7 strains, we conclude that the KO8 biofilm defect is likely to be due to pleiotropic effects of  
320 exoprotease gene deletion, rather than being a specific impact of altered TapA processing. These findings  
321 raise the possibility that TapA is degraded (recycled) after it has fulfilled its role in biofilm formation or  
322 support the notion that TapA plays a second role in *B. subtilis* physiology that is yet to be elucidated.

323 Having ruled out that the defect in biofilm formation observed for the exoprotease-free KO8 strains is not  
324 because of aberrant TapA processing, the reason why the loss of eight extracellular proteases impacts  
325 biofilm rugosity remains unknown. It is possible that the lack of extracellular proteases could impact the  
326 abundance of quorum sensing peptides in the extracellular environment. This is in line with evidence  
327 demonstrating that exoproteases control both the production and degradation of the quorum sensing  
328 signalling molecule ComX (Spacapan *et al.*, 2018). An accumulation of quorum sensing peptides in the  
329 biofilm microenvironment may have a global impact on the physiology of the KO8 strain due to an  
330 alteration in cell signalling pathways (Kalamara *et al.*, 2018, Miller & Bassler, 2001).

331 The generation of a strain that lacked the known extracellular proteases allowed us to test the hypothesis  
332 that TapA functions as a chaperone during TasA fibre formation. This hypothesis was raised as while  
333 fibrous TasA (fTasA) is resistant to proteolysis when TasA is in its monomeric form (mTasA) it is sensitive

334 to the action of proteases. When this knowledge was coupled with reduction of TasA levels in a *tapA*  
335 mutant, it was hypothesised that TapA could serve as a chaperone interacting with mTasA and preventing  
336 degradation to facilitate fibre formation. In this model, when the exoproteases are absent, TapA would  
337 not be needed for wild-type biofilm formation. However, when the morphology of the KO7  $\Delta tapA$  and  
338 KO8  $\Delta tapA$  strains were analysed they both resembled the appearance of a  $\Delta tapA$  mutant. These findings  
339 therefore indicate that TapA does not play a significant role in protecting TasA from proteolysis by the  
340 extracellular enzymes.

### 341 **Concluding Remarks**

342 Through this analysis we have expanded our knowledge of the protein TapA which is needed for biofilm  
343 formation by *B. subtilis*. We have revealed that TapA<sub>1-57</sub> is a key component of the functional form of TapA  
344 *in vivo*, allowing biofilm formation. The main body of the protein is entirely dispensable in this  
345 experimental set up. We have shown that TapA is processed *in vivo* but that processing by the self-  
346 produced exoproteases is not an essential step to generate a functional protein form. The exact  
347 mechanism by which TapA is needed to stimulate TasA stability *in vivo* requires more elucidation, but the  
348 amino acids that were found to be critical for function between amino acids 45-57 provide a starting point  
349 for analysis. Finally we have ruled out the possibility that *tapA* is not needed when extracellular proteases  
350 are not present. Therefore exactly how TapA functions to promote biofilm formation remains to be  
351 elucidated.



352 **Growth media and additives**

353 Lysogeny broth (LB) was prepared using 10 g typtone, 10 g NaCl and 5 g yeast extract for 1 litre. LB agar  
354 was prepared by solidifying with 15 g of select agar for growth of *B. subtilis* and *E. coli*. For antibiotic  
355 selection with *B. subtilis* strains antibiotics were used at the following final concentrations: erythromycin  
356 (0.5 µg/mL), spectinomycin 100 µg/mL and MLS, erythromycin (0.5 µg/mL) together with lincomycin  
357 (12.5 µg/mL). For antibiotic selection of plasmids in *E. coli* ampicillin was used at a concentration of 100  
358 µg/mL.

359 To make Minimal Salts glycerol glutamate (MSgg) plates 5 mM potassium phosphate, 100 mM MOPS at  
360 pH 7.0 with agar to a final concentration of 1.5% (w/v) was autoclaved and cooled to 55°C before being  
361 supplemented with 2 mM MgCl<sub>2</sub>, 700 µM CaCl<sub>2</sub>, 50 µM FeCl<sub>3</sub>, 50 µM MnCl<sub>2</sub>, 1 µM ZnCl<sub>2</sub>, 2 µM thiamine,  
362 0.5% (v/v) glycerol, 0.5% (w/v) glutamic acid. For induction of gene expression from the P<sub>spank</sub> promoter  
363 (P<sub>IPTG</sub>) isopropyl β-D-1-thiogalactopyranoside (IPTG) was included at a final concentration of 25 µM. For  
364 MSgg broth the same recipe was followed without the addition of agar.

365 **Plasmid construction.**

366 Plasmids (Table S2) were constructed by using standard methods using the primers detailed in Table S3.

367 **Strain construction**

368 Strains used in this study are detailed in Table S1. Complementation alleles and antibiotic resistance  
369 cassette marked gene deletions were moved between strains using either SSP1 mediated phage  
370 transduction (Verhamme *et al.*, 2007) or genetic competence with genomic DNA. The following strains  
371 were used for amplification of coding regions: *B. subtilis* strain NCIB 3610 (GenBank Accession number:  
372 CP020102.1); *B. amyloliquefaciens* FZB42 (GenBank Accession number: CP000560.1); *B.*  
373 *paralicheniformis* (kindly provided by Dr. Nijland) and *B. pumilis* SAFR-032 (GenBank Accession number:  
374 CP000813.4).

375

376 The  $\Delta tapA$  and  $\Delta sipW$  deletion strains were generated by allelic exchange in a method similar to that  
377 previously published using the pMAD plasmid (Arnaud *et al.*, 2004). Briefly, a 395 bp upstream region  
378 was amplified by PCR with primers NSW1308 and NSW1332 and a 641 bp downstream region was  
379 amplified using primers NSW1333 and NSW1334. Both fragments were cloned into the pMini-MAD  
380 vector (Patrick & Kearns, 2008a) to generate plasmid pNW685. For the *sipW* deletion strain a 1,128 bp  
381 fragment containing 572 bp of sequence upstream of the *sipW* locus followed by a 36 bp open reading

382 frame in place of *sipW*, with 572 bp of sequence downstream of *sipW* was synthesised (GenScript). The  
383 fragment was cloned into the pMini-MAD vector to generate plasmid pNW2021.

384

385 To construct the in frame deletions in all 8 genes encoding the secreted proteases *B. subtilis* NCIB3610  
386 *comI* (Patrick & Kearns, 2008a), the BKE collection was utilised (Koo *et al.*, 2017b) where single gene  
387 deletions have been replaced with a cassette providing resistance to erythromycin. Genomic DNA was  
388 extracted from strains in the BKE collection and used to transform competent *B. subtilis* 3610 *comI*  
389 (Konkol *et al.*, 2013) before selection on LB erythromycin plates. The erythromycin cassette contains *lox*  
390 sites and was subsequently removed leaving a 150 base pair scar by the action of a Cre recombinase,  
391 which was expressed on the heat-sensitive plasmid pDR244. In cases in which transformation with  
392 genomic DNA proved unsuccessful then the mutation was introduced by phage transduction with SPP1  
393 phage. All the strains were examined using PCR and DNA sequencing to ensure the specificity in the  
394 region deleted from the chromosome. The intermediate strains are fully detailed in Table S1. The in  
395 frame *tapA* deletion was introduced using plasmid pNW685 described above.

396 The variant *tapA* coding regions were introduced into *B. subtilis* chromosome at the *amyE* locus. Double  
397 recombination events were identified by assessing the production of  $\alpha$ -amylase on LB growth medium  
398 supplemented with 1% (w/v) soluble starch.

### 399 **Growth analysis**

400 Lawn plates were set up by suspending a single colony in 100  $\mu$ L of LB medium and plating the  
401 suspension onto LB agar and incubated overnight at 25°C. After ~24 h the cells were washed from the  
402 plate in 5 mL of MSgg broth and the absorbance at 600 nm measured. The volume of cell suspension  
403 used to inoculate was calculated based on a desired starting OD<sub>600nm</sub> of 0.1. Cultures were grown in 25  
404 mL of MSgg broth in a 250 mL conical flask in a water bath set to 30°C with shaking at 200 rpm.

### 405 ***In vivo* analysis of exoprotease production**

406 Detection of exoprotease production was conducted as previously described (Verhamme *et al.*, 2007)  
407 using LB agar plates supplemented with 1.5% (w/v) dried milk powder. Strains were grown in 3 mL of LB  
408 broth at 37°C to an OD<sub>600nm</sub> of ~ 1. The cultures were normalized and 10  $\mu$ L of the prepared cell culture  
409 spotted onto the plate. The samples were then grown for 20 h at 37°C prior to photography.

### 410 **Biofilm growth and analysis**

411 Biofilms were prepared by growing *B. subtilis* in 3 mL of LB broth at 37°C with aeration for ~3.5 hours.  
412 After which, 10 µL of the culture was spotted onto an MSgg agar plate that was incubated at 30°C for 48  
413 hours. Imaging used a Leica MZ16 stereoscope (Leica Microsystems). IPTG was included in the growth  
414 medium to induce expression from the P<sub>spank</sub> promoter as indicated: a concentration of 25 µM IPTG was  
415 used, unless otherwise stated.

#### 416 **Protein extraction from biofilms**

417 Biofilms were isolated from MSgg plates with a sterile loop and suspended in 250 µL of BugBuster  
418 solution (Millipore) using a syringe with a 23 x 1 gauge needle until dispersed. The samples were  
419 sonicated at an amplitude of 20% power for 5 seconds. Sonicated biofilms were incubated at 26°C for 20  
420 min with shaking at 1,400 rpm before centrifugation for 10 min in a benchtop centrifuge at 13,000 rpm.  
421 The liquid phase was retained for further analysis by SDS-PAGE and/or immunoblot. Protein  
422 concentration of biofilm lysates was determined by measuring absorbance at 280 nm (NanoDrop  
423 spectrophotometer) or by using the DC protein assay (BIO-RAD) which is based on the Lowry assay  
424 (Lowry *et al.*, 1951).

#### 425 **Protein purification**

426 Recombinant *B. subtilis* TapA<sub>44-253</sub>, mTasA (Erskine *et al.*, 2018b) and fTasA (Erskine *et al.*, 2018b)  
427 proteins were produced and separated from a Glutathione S-transferase-tag with a tobacco etch virus  
428 (TEV) protease-cleavage site using the pGEX-6P-1 system. The pGEX-6P-1 plasmid carrying the gene  
429 encoding the protein was introduced into *E. coli* strain BL21 (DE3) pLysS. The cells were grown overnight  
430 in 5 mL LB broth and used to inoculate auto-induction media (Studier, 2005) supplemented with  
431 ampicillin (100 µg/mL) at a ratio of 1:1000 (vol:vol) in a total volume of 1 litre. The cultures were  
432 incubated at 30°C with shaking for approximately 6-7 h at which point the temperature was reduced to  
433 18°C for overnight incubation. The cell culture was pelleted by centrifugation for 45 min at 5020 g and  
434 re-suspended in 25 mL purification buffer (Tris 25 mM and NaCl 250 mM (pH 7.6)) supplemented with  
435 Complete EDTA-free proteinase inhibitors mixture (Roche). Cell lysis was carried out by sonication at an  
436 amplitude of 20% for a total of 6 minutes. Unlysed cells and cell debris were removed by centrifugation  
437 at 27,000 x g for 20 min. The cleared lysate was mixed with 750 µL (per litre of culture) Glutathione  
438 Sepharose 4B (GE Healthcare) and gently agitated at 4°C for at least 3 h to allow binding of GST to the  
439 beads. The lysate/bead mixture was loaded onto a single-use, 25 mL gravity flow column (Bio-Rad). The  
440 beads were washed using 50 mL purification buffer, collected and incubated overnight at 4°C with

441 agitation in 25 mL of purification buffer supplemented with 1 mM DTT and 0.5 mg of TEV protease to  
442 release the protein from the GST-tag. The solution containing TapA, TEV protease, free-GST and the  
443 beads was loaded onto the gravity flow column. This removed the used beads which stay on the column.  
444 The flow-through was added to 250  $\mu$ L Ni-nitrilotriacetic acid agarose (Qiagen) slurry to remove the TEV  
445 protease and 750  $\mu$ L glutathione sepharose 4B to remove the free GST-tag. The mixture was incubated  
446 at 4°C with agitation overnight, and then passed through a gravity flow column. The purified protein was  
447 concentrated using a Vivaspin 20 concentrator (with a MW cut-off of 5,000 or 10,000 Sartorius). The  
448 protein concentration was determined by measuring absorbance at 280 nm (NanoDrop  
449 spectrophotometer) and then analysed by separating  $\sim$ 30  $\mu$ g by SDS-PAGE.

#### 450 **Protein stability in culture supernatant**

451 To collect spent culture supernatant the following process was used. Initially lawn plates were set up by  
452 suspending a single colony in 100  $\mu$ L of LB medium and plating the suspension onto LB agar. Lawn plates  
453 were incubated overnight at 25°C. After  $\sim$ 24 h the cells were washed from the plate in 5 mL of MSgg  
454 broth and the absorbance at 600 nm measured. The volume of cell suspension used to inoculate was  
455 calculated based on a desired starting OD<sub>600nm</sub> of 0.1. Cultures were grown in 25 mL of MSgg broth in a  
456 250 mL conical flask in a water bath set to 30°C with shaking at 200 rpm. Early stationary phase cultures  
457 were harvested at an OD<sub>600</sub> of approximately 4.0 and normalized. The harvested culture was then  
458 pelleted by centrifugation at 3220 x g for 10 min and the full volume of supernatant was filter-sterilized  
459 to remove bacterial cells. The supernatant protease activity assay was set up by mixing supernatant 1:1  
460 (vol:vol) with purified TapA, mTasA or fTasA protein (to give a total volume of 40  $\mu$ L) and incubating the  
461 mixture at 37°C for 8 h. This gave a protein concentration in the assay of 3  $\mu$ g/ $\mu$ L, and a total  
462 recombinant protein amount of 120  $\mu$ g. Heat-inactivation of the supernatant was carried out by  
463 incubating the supernatant samples at 100°C for 10 min prior to use. The integrity of the recombinant  
464 protein was then assessed by SDS-PAGE, stained with InstantBlue, Coomassie based stain. 28  $\mu$ g of  
465 protein was loaded onto the gel, this was calculated based on the starting assay concentration of 3  
466  $\mu$ g/ $\mu$ L.

#### 467 **Antibody Production**

468 A custom antibody that could be used to detect TapA from *B. subtilis* was raised in a rabbit using  
469 purified recombinant TapA<sub>34-253</sub> as the antigen (Eurogentec). The antibodies specific to recombinant

470 TapA<sub>34-253</sub> were purified from the serum using standard methods by the MRC Protein reagents and  
471 services team (<https://mrcppureagents.dundee.ac.uk/our-services/custom-antibody-production>).

#### 472 **Immunoblot analysis**

473 Samples to be analysed by immunoblotting were separated by SDS-PAGE. The proteins were transferred  
474 to hydrophobic polyvinylidene difluoride (PVDF) membranes (Immobilon-P (Millipore)) by  
475 electroblotting. The membranes were first incubated with a 5% (w/v) semi-skimmed dry milk solution in  
476 TBS-tween 0.2% (v/v) for at least 1 hour at room temperature or overnight at 4°C to reduce non-specific  
477 binding. After which the membrane was incubated with the primary antibody overnight at 4°C (dilution  
478 as follows: 1:5000  $\alpha$ TapA, 1:25,000  $\alpha$ TasA). After incubation with the primary antibody, the membrane  
479 was washed 3 times with TBS-tween 0.2% (v/v) to remove unbound primary antibody and incubated  
480 with the species-specific secondary HRP-conjugated antibody (Goat  $\alpha$  Rabbit, dilution 1:5000) for 1 hour  
481 at room temperature in TBS-tween 0.2% (v/v). The wash steps were repeated before development was  
482 induced with Enhanced Chemi-Luminescence reagents (ECL; BioRad Clarity). An electronic image was  
483 captured using the GeneGnome (SynGene) system.

#### 484 **Bioinformatics analysis**

485 Protein sequences of TapA homologues were aligned using Clustal Omega using default settings (Sievers  
486 *et al.*, 2011). Percentage identity between TapA orthologues was calculated with reference to *B. subtilis*  
487 TapA using the pairwise alignment function on the Jalview 2 workbench (Waterhouse *et al.*, 2009). For  
488 the prediction of signal peptides for all TapA variants then the SignalP 4.1 server was used and set to the  
489 organism group “Gram-positive” (Petersen *et al.*, 2011).

490

491 **Acknowledgements**

492 Work was supported by the Biotechnology and Biological Sciences Research Council [BB/L006804/1;  
493 BB/L006979/1; BB/M013774/1; BB/N022254/1]. CE was supported by the Wellcome Institutional  
494 Strategic Support Fund (Award no. 097818/Z/11). We are grateful to Dr. Hobley for the *tapA* deletion  
495 strain, Dr. Elliot Erskine for the *sipW* deletion strain, Dr. Laura D'Ignazio for plasmid pNW1600 and  
496 Rachel Gillespie for construction of a number of strains and plasmids.

497

498 **References:**

- 499 Abbasi, R., R. Mousa, N. Dekel, H. Amartely, T. Danieli, M. Lebendiker, Y. Levi-Kalishman, D.E. Shalev, N.  
500 Metanis & L. Chai, (2019) The Bacterial Extracellular Matrix Protein TapA Is a Two-Domain  
501 Partially Disordered Protein. *Chembiochem* **20**: 355-359.
- 502 Arnaud, M., A. Chastanet & M. Débarbouillé, (2004) New vector for efficient allelic replacement in  
503 naturally nontransformable, low-GC-content, Gram-positive Bacteria. *Applied and*  
504 *Environmental Microbiology* **70**: 6887-6891.
- 505 Branda, S.S., F. Chu, D.B. Kearns, R. Losick & R. Kolter, (2006) A major protein component of the *Bacillus*  
506 *subtilis* biofilm matrix. *Mol Microbiol* **59**: 1229-1238.
- 507 Britton, R.A., P. Eichenberger, J.E. Gonzalez-Pastor, P. Fawcett, R. Monson, R. Losick & A.D. Grossman,  
508 (2002) Genome-Wide Analysis of the Stationary-Phase Sigma Factor (Sigma-H) Regulon of  
509 *Bacillus subtilis*. *Journal of Bacteriology* **184**: 4881-4890.
- 510 Cairns, L.S., L. Hobley & N.R. Stanley-Wall, (2014) Biofilm formation by *Bacillus subtilis*: new insights into  
511 regulatory strategies and assembly mechanisms. *Mol Microbiol* **93**: 587-598.
- 512 Dragos, A. & A.T. Kovacs, (2017) The Peculiar Functions of the Bacterial Extracellular Matrix. *Trends*  
513 *Microbiol* **25**: 257-266.
- 514 Duthie, E.S., (1944) The Production of Penicillinase by Organisms of the *Subtilis* Group. *British Journal of*  
515 *Experimental Pathology* **25**: 96-100.
- 516 El Mammeri, N., J. Hierrezuelo, J. Tolchard, J. Camara-Almiron, J. Caro-Astorga, A. Alvarez-Mena, A.  
517 Dutour, M. Berbon, J. Shenoy, E. Morvan, A. Grelard, B. Kauffmann, S. Lecomte, A. de Vicente, B.  
518 Habenstein, D. Romero & A. Loquet, (2019) Molecular architecture of bacterial amyloids in  
519 *Bacillus* biofilms. *Faseb J*: fj201900831R.
- 520 Erskine, E., C.E. MacPhee & N.R. Stanley-Wall, (2018a) Functional Amyloid and Other Protein Fibers in  
521 the Biofilm Matrix. *J Mol Biol* **430**: 3642-3656.
- 522 Erskine, E., R.J. Morris, M. Schor, C. Earl, R.M.C. Gillespie, K.M. Bromley, T. Sukhodub, L. Clark, P.K. Fyfe,  
523 L.C. Serpell, N.R. Stanley-Wall & C.E. MacPhee, (2018b) Formation of functional, non-  
524 amyloidogenic fibres by recombinant *Bacillus subtilis* TasA. *Mol Microbiol* **110**: 897-913.
- 525 Flemming, H.C., J. Wingender, U. Szewzyk, P. Steinberg, S.A. Rice & S. Kjelleberg, (2016) Biofilms: an  
526 emergent form of bacterial life. *Nat Rev Microbiol* **14**: 563-575.
- 527 Hobley, L., C. Harkins, C.E. MacPhee & N.R. Stanley-Wall, (2015) Giving structure to the biofilm matrix:  
528 an overview of individual strategies and emerging common themes. *FEMS Microbiol Rev* **39**:  
529 649-669.
- 530 Hobley, L., A. Ostrowski, F.V. Rao, K.M. Bromley, M. Porter, A.R. Prescott, C.E. MacPhee, D.M. van Aalten  
531 & N.R. Stanley-Wall, (2013) BslA is a self-assembling bacterial hydrophobin that coats the  
532 *Bacillus subtilis* biofilm. *P Natl Acad Sci USA* **110**: 13600-13605.
- 533 Kalamara, M., M. Spacapan, I. Mandic-Mulec & N.R. Stanley-Wall, (2018) Social behaviours by *Bacillus*  
534 *subtilis*: quorum sensing, kin discrimination and beyond. *Mol Microbiol* **110**: 863-878.
- 535 Kobayashi, K. & M. Iwano, (2012) BslA (YuaB) forms a hydrophobic layer on the surface of *Bacillus*  
536 *subtilis* biofilms. *Mol Microbiol* **85**: 51-66.
- 537 Konkol, M.A., K.M. Blair & D.B. Kearns, (2013) Plasmid-Encoded ComI Inhibits Competence in the  
538 Ancestral 3610 Strain of *Bacillus subtilis*. *Journal of Bacteriology* **195**: 4085-4093.
- 539 Koo, B.-M., G. Kritikos, J.D. Farelli, H. Todor, K. Tong, H. Kimsey, I. Wapinski, M. Galardini, A. Cabal, J.M.  
540 Peters, A.-B. Hachmann, D.Z. Rudner, K.N. Allen, A. Typas & C.A. Gross, (2017a) Construction and  
541 Analysis of Two Genome-Scale Deletion Libraries for *Bacillus subtilis*. *Cell Systems* **4**: 291-  
542 305.e297.
- 543 Koo, B.M., G. Kritikos, J.D. Farelli, H. Todor, K. Tong, H. Kimsey, I. Wapinski, M. Galardini, A. Cabal, J.M.  
544 Peters, A.B. Hachmann, D.Z. Rudner, K.N. Allen, A. Typas & C.A. Gross, (2017b) Construction and

- 545 Analysis of Two Genome-Scale Deletion Libraries for *Bacillus subtilis*. *Cell systems* **4**: 291-305  
546 e297.
- 547 Lowry, O.H., N.J. Rosebrough, A.L. Farr & R.J. Randall, (1951) Protein measurement with the Folin phenol  
548 reagent. *J Biol Chem* **193**: 265-275.
- 549 Miller, M.B. & B.L. Bassler, (2001) Quorum sensing in bacteria. *Annu Rev Microbiol* **55**: 165-199.
- 550 Msadek, T., F. Kunst, D. Henner, A. Klier, G. Rapoport & R. Dedonder, (1990) Signal transduction  
551 pathway controlling synthesis of a class of degradative enzymes in *Bacillus subtilis*: expression of  
552 the regulatory genes and analysis of mutations in *degS* and *degU*. *J Bacteriol* **172**: 824-834.
- 553 Patrick, J.E. & D.B. Kearns, (2008a) MinJ (YvjD) is a topological determinant of cell division in *Bacillus*  
554 *subtilis*. *Mol Microbiol* **70**: 1166-1179.
- 555 Patrick, J.E. & D.B. Kearns, (2008b) MinJ (YvjD) is a topological determinant of cell division in *Bacillus*  
556 *subtilis*. *Molecular Microbiology* **70**: 1166-1179.
- 557 Petersen, T.N., S. Brunak, G. von Heijne & H. Nielsen, (2011) SignalP 4.0: discriminating signal peptides  
558 from transmembrane regions. *Nat Methods* **8**: 785-786.
- 559 Priest, F.G., M. Goodfellow & C. Todd, (1988) A numerical classification of the genus *Bacillus*.  
560 *Microbiology* **134**: 1847-1882.
- 561 Roberts, M.S. & F.M. Cohan, (1995) Recombination and migration rates in natural populations of *Bacillus*  
562 *subtilis* and *Bacillus mojavensis*. *Evolution*: 1081-1094.
- 563 Romero, D., C. Aguilar, R. Losick & R. Kolter, (2010) Amyloid fibers provide structural integrity to *Bacillus*  
564 *subtilis* biofilms. *Proc Natl Acad Sci U S A* **107**: 2230-2234.
- 565 Romero, D., H. Vlamakis, R. Losick & R. Kolter, (2011) An accessory protein required for anchoring and  
566 assembly of amyloid fibres in *B. subtilis* biofilms. *Molecular Microbiology*.
- 567 Romero, D., H. Vlamakis, R. Losick & R. Kolter, (2014) Functional analysis of the accessory protein TapA  
568 in *Bacillus subtilis* amyloid fiber assembly. *J Bacteriol* **196**: 1505-1513.
- 569 Sievers, F., A. Wilm, D. Dineen, T.J. Gibson, K. Karplus, W. Li, R. Lopez, H. McWilliam, M. Remmert, J.  
570 Soding, J.D. Thompson & D.G. Higgins, (2011) Fast, scalable generation of high-quality protein  
571 multiple sequence alignments using Clustal Omega. *Mol Syst Biol* **7**: 539.
- 572 Spacapan, M., T. Danevcic & I. Mandic-Mulec, (2018) ComX-Induced Exoproteases Degrade ComX in  
573 *Bacillus subtilis* PS-216. *Frontiers in microbiology* **9**: 105.
- 574 Stover, A.G. & A. Driks, (1999a) Control of synthesis and secretion of the *Bacillus subtilis* protein YqxM. *J.*  
575 *bacteriol.* **181**: 7065-7069.
- 576 Stover, A.G. & A. Driks, (1999b) Secretion, localization and antibacterial activity of *tasA*, a *Bacillus subtilis*  
577 spore-associated protein. *J. bacteriol.* **181**: 1664-1672.
- 578 Studier, F.W., (2005) Protein production by auto-induction in high-density shaking cultures. *Protein*  
579 *expression and purification* **41**: 207-234.
- 580 Studier, F.W. & B.A. Moffatt, (1986) Use of bacteriophage T7 RNA polymerase to direct selective high-  
581 level expression of cloned genes. *Journal of Molecular Biology* **189**: 113-130.
- 582 Terra, R., N.R. Stanley-Wall, G. Cao & B.A. Lazazzera, (2012) Identification of *Bacillus subtilis* SipW as a  
583 bifunctional signal peptidase that controls surface-adhered biofilm formation. *Journal of*  
584 *Bacteriology* **194**: 2781-2790.
- 585 Verhamme, D.T., T.B. Kiley & N.R. Stanley-Wall, (2007) DegU co-ordinates multicellular behaviour  
586 exhibited by *Bacillus subtilis*. *Mol Microbiol* **65**: 554-568.
- 587 Waterhouse, A.M., J.B. Procter, D.M. Martin, M. Clamp & G.J. Barton, (2009) Jalview Version 2--a  
588 multiple sequence alignment editor and analysis workbench. *Bioinformatics* **25**: 1189-1191.
- 589 Zhu, B. & J. Stulke, (2018) SubtiWiki in 2018: from genes and proteins to functional network annotation  
590 of the model organism *Bacillus subtilis*. *Nucleic Acids Res* **46**: D743-D748.

591



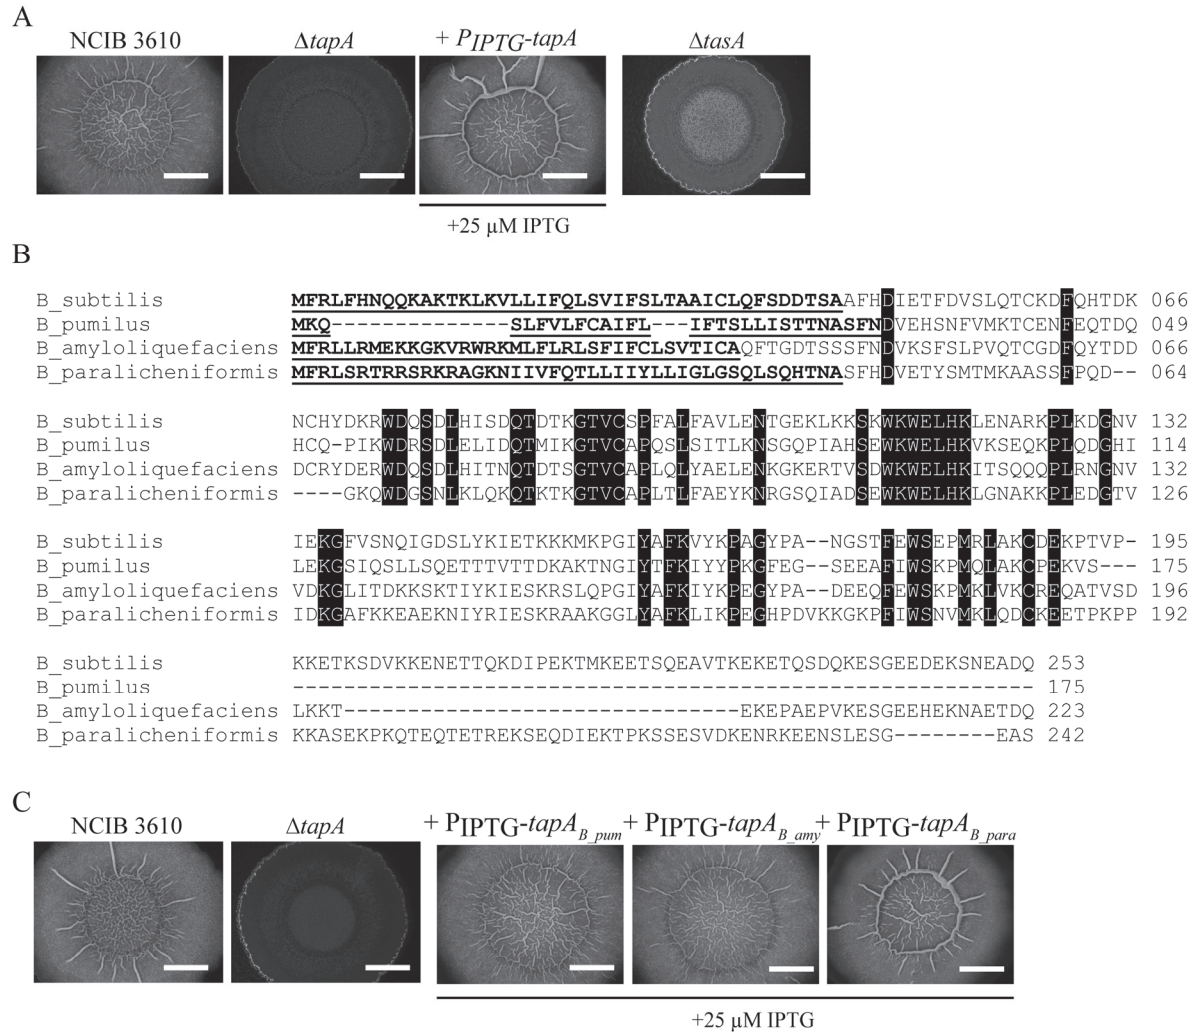

592

593 **Figure 1: The *tapA* mutant can be complemented by orthologous genes. (A)** Biofilms formed by  
 594 NCIB3610,  $\Delta tapA$  (NRS3936), + $P_{IPTG-tapA}$  (NRS5045) and  $\Delta tasA$  (NRS5267).  $n > 3$ ; (B) Alignment of TapA  
 595 protein sequences from *B. subtilis*, *B. pumilus*, *B. amyloliquefaciens* and *B. paralicheniformis*. The  
 596 percentage amino acid sequence identity with regards the *B. subtilis* TapA sequence is as follows: *B.*  
 597 *pumilus*- 42%, *B. amyloliquefaciens*- 49% and *B. paralicheniformis*- 38%. The bold underlined sequence  
 598 represents the signal sequence, the black boxes indicate identical amino acids; (C) Biofilms formed by  
 599 NCIB3610,  $\Delta tapA$  (NRS3936), + $P_{IPTG-tapA_{B_{pum}}}$  (NRS5046), + $P_{IPTG-tapA_{B_{amy}}}$  (NRS5047), and + $P_{IPTG-tapA_{B_{para}}}$   
 600 (NRS5741).  $n > 3$ . Biofilms were grown at 30°C for 48 hours in the presence of IPTG as indicated. The  
 601 scale bars represent 1 cm.

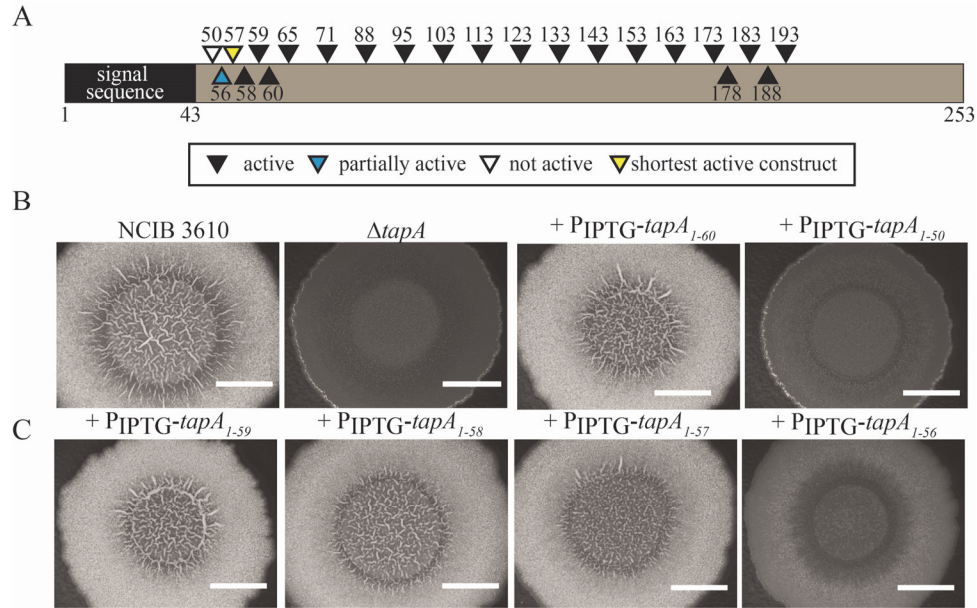

603 **Figure 2: The *tapA* coding region is functional when truncated.** (A) Schematic of the constructs  
604 generated and ability to restore rugose biofilm formation to the  $\Delta tapA$  deletion strain when expressed  
605 from an ectopic position on the chromosome. Drawn approximately to scale.; (B) Biofilms formed by  
606 NCIB3610,  $\Delta tapA$  (NRS3936), +PIPTG-*tapA*<sub>1-60</sub> (NRS6044), and *tapA*<sub>1-50</sub> (NRS6002); (C) Biofilms formed by  
607 +PIPTG-*tapA*<sub>1-59</sub> (NRS6043), +PIPTG-*tapA*<sub>1-58</sub> (NRS6042), +PIPTG-*tapA*<sub>1-57</sub> (NRS6041), and +PIPTG-*tapA*<sub>1-56</sub>  
608 (NRS6025). Biofilms were grown at 30°C for 48 hours in the presence of 25  $\mu$ M IPTG. Biofilm images are  
609 representative of at least 3 independent replicates. The scale bars represent 1 cm.

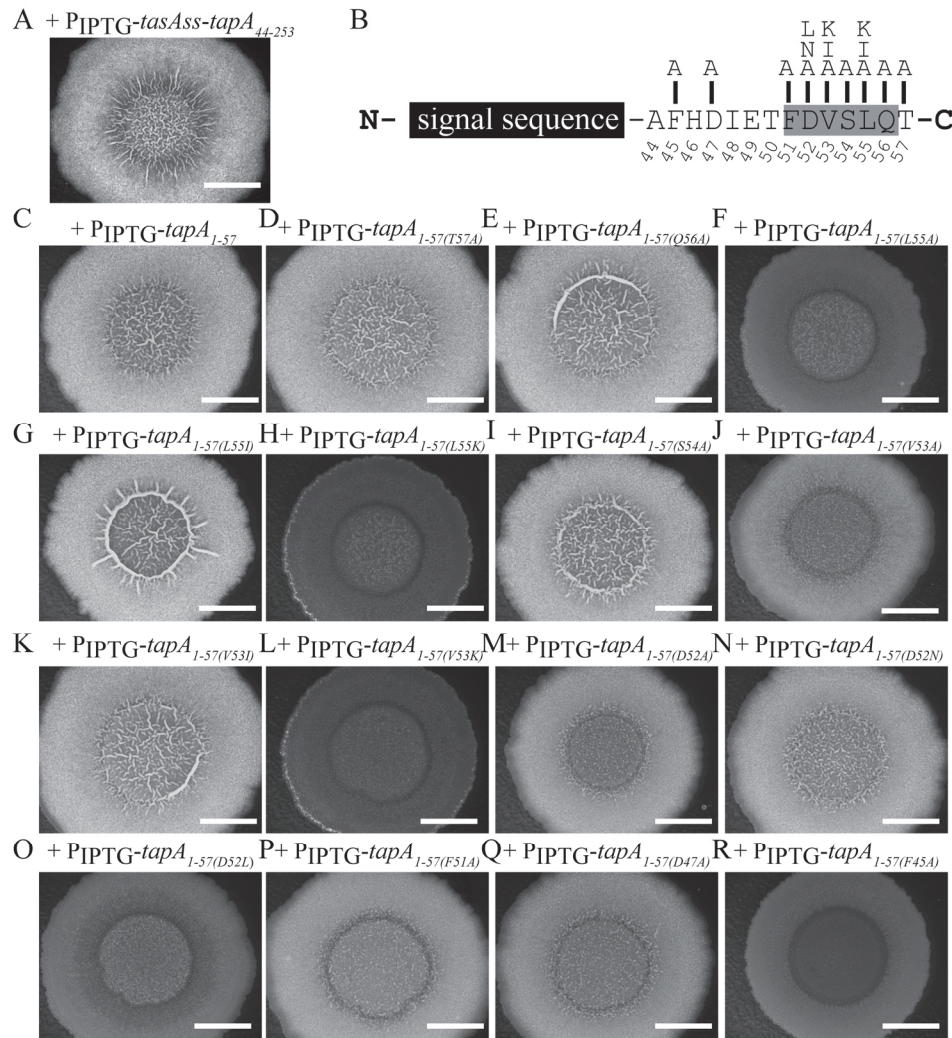

610

611 **Figure 3: Identification of critical amino acids in the *tapA* coding region.** (A) Biofilms formed by  
 612 NRS6536 the *tasA* signal sequence replaces the native *tapA* signal sequence; (B) Schematic of the amino  
 613 acid substitutions tested in (C-R); Biofilms formed by (C) +PIPTG-*tapA*<sub>1-57</sub> (NRS6041); (D) +PIPTG-*tapA*<sub>1-57</sub>  
 614 T57A (NRS6384); (E) +PIPTG-*tapA*<sub>1-57</sub> Q56A (NRS6385); (F) +PIPTG-*tapA*<sub>1-57</sub> L55A (NRS6472); (G) +PIPTG-*tapA*<sub>1-</sub>  
 615 <sub>57</sub> L55I (NRS6386); (H) +PIPTG-*tapA*<sub>1-57</sub> L55K (NRS6387); (I) +PIPTG-*tapA*<sub>1-57</sub> S54A (NRS6388); (J) +PIPTG-*tapA*<sub>1-</sub>  
 616 <sub>57</sub> V53A (NRS6473); (K) +PIPTG-*tapA*<sub>1-57</sub> V53I (NRS6389); (L) +PIPTG-*tapA*<sub>1-57</sub> V53K (NRS6502); (M) +PIPTG-  
 617 *tapA*<sub>1-57</sub> D52A (NRS6476); (N) +PIPTG-*tapA*<sub>1-57</sub> D52N (NRS6516); (O) +PIPTG-*tapA*<sub>1-57</sub> D52L (NRS6477); (P)  
 618 +PIPTG-*tapA*<sub>1-57</sub> F51A (NRS6390); (Q) +PIPTG-*tapA*<sub>1-57</sub> D47A(NRS6475); and (R) +PIPTG-*tapA*<sub>1-57</sub> F45A  
 619 (NRS6474). Biofilms were grown at 30°C for 48 hours in the presence of 25 μM IPTG. n = 3. The scale bars  
 620 represent 1 cm.

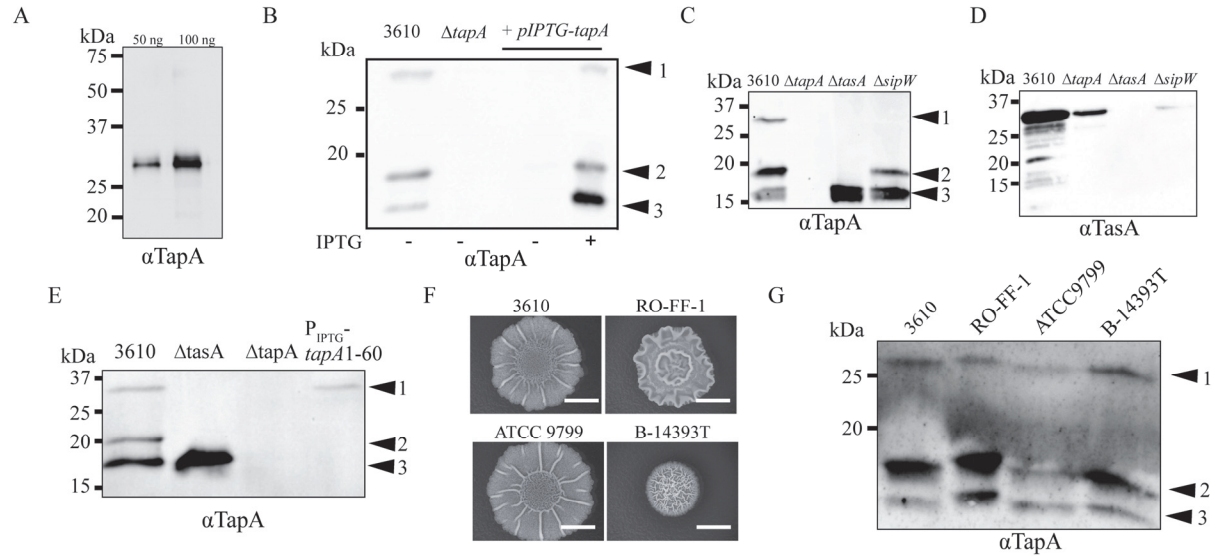

621

622 **Figure 4: TapA is processed *in vivo*.** (A) Immunoblot analysis of 50 and 100 ng of recombinant TapA<sub>44-253</sub>  
623 using  $\alpha$ TapA antibodies; (B) Immunoblot analysis of proteins extracted from biofilms formed by  
624 NCIB3610,  $\Delta$ tapA (NRS3936), +P<sub>IPTG</sub>-tapA (NRS5045) (in the absence or presence of 25  $\mu$ M IPTG as  
625 indicated) using  $\alpha$ TapA antibodies. n= 2; (C, D) Immunoblot analysis of proteins extracted from biofilms  
626 formed by NCIB3610,  $\Delta$ tapA (NRS3936),  $\Delta$ tasA (NRS5267) and  $\Delta$ sipW (NRS5488) strains using (C)  $\alpha$ TapA  
627 and (D)  $\alpha$ TasA antibodies. n= 2; (E) Immunoblot analysis of proteins extracted from biofilms formed in  
628 the presence of 25  $\mu$ M IPTG by NCIB3610,  $\Delta$ tasA (NRS5267),  $\Delta$ tapA (NRS3936), +P<sub>IPTG</sub>-tapA<sub>1-60</sub> (NRS6044)  
629 using  $\alpha$ TapA antibodies. n= 2; (F) Biofilms formed by *B. subtilis* isolates NCIB3610, RO-FF-1, ATCC 9799,  
630 and B-14393T after growth at 30°C for 48 hours. Biofilm images are representative of at least 3  
631 independent replicates. The scale bars represent 1 cm; (G) Immunoblot analysis of proteins extracted  
632 from biofilms formed by NCIB3610, RO-FF-1, ATCC 9799 and B-14393T using  $\alpha$ TapA antibodies. n= 3.

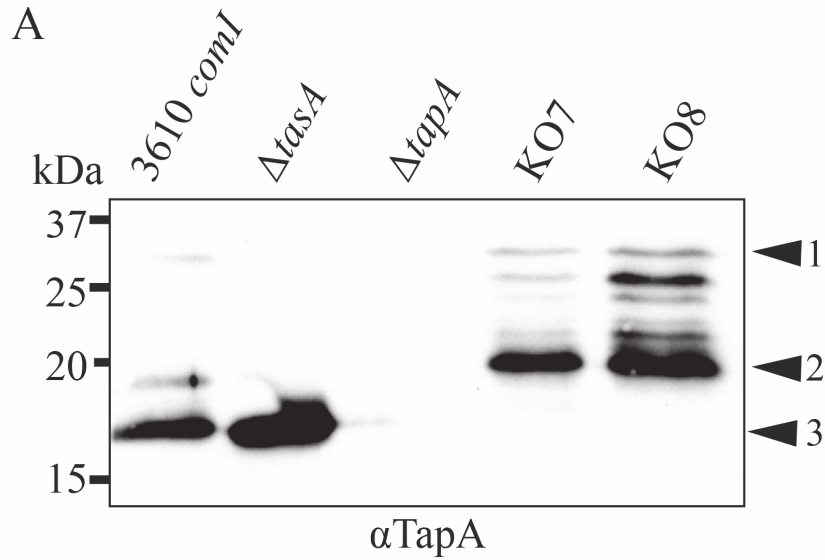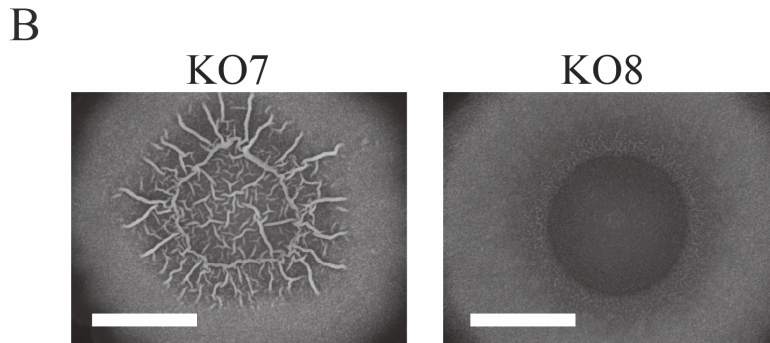

633

634 **Figure 5: Proteolytic cleavage of TapA is not a prerequisite for biofilm formation.** (A) Immunoblot  
635 analysis of proteins extracted from biofilms formed by NCIB3610,  $\Delta$ *tasA* (NRS5267),  $\Delta$ *tapA* (NRS3936),  
636 KO7 (NRS6362) and KO8 (NRS5645) using  $\alpha$ TapA antibodies; n = 2. (B) Biofilms formed by *B. subtilis*  
637 isolates KO7 (NRS6362) and KO8 (NRS5645) after growth at 30°C for 48 hours. Biofilm images are  
638 representative of at least 3 independent replicates. The scale bars represent 1 cm.

639

640

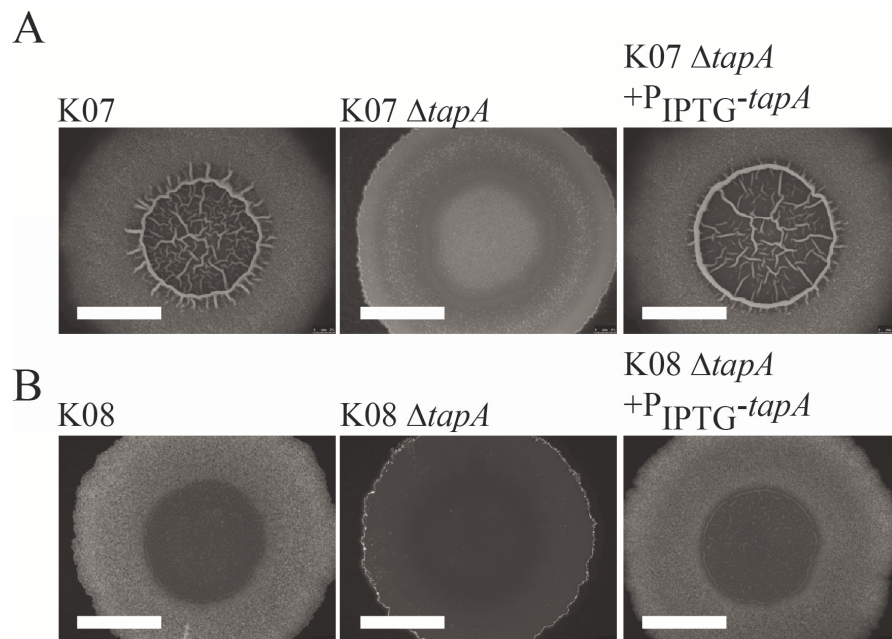

641

642 **Figure 6: The *tapA* coding region is needed for biofilm formation in the absence of extracellular**  
643 **proteases.** Biofilms formed by *B. subtilis* isolates (A) K07 (NRS6362), K07  $\Delta tapA$  (NRS6293), K07  $\Delta tapA$   
644 P<sub>IPTG</sub>-*tapA-lacI* (NRS6295); (B) K08 (NRS5645), K08  $\Delta tapA$  (NRS5646), K08  $\Delta tapA$  P<sub>IPTG</sub>-*tapA-lacI*  
645 (NRS5647); after growth at 30°C for 48 hours. Biofilm images are representative of at least 3  
646 independent replicates. The scale bars represent 1 cm.

647
